# Supplementary figures and images for: Clinical‐pathological features in placentas of pregnancies with SARS‐CoV‐2 infection and adverse outcome: case series with and without congenital transmission
Source: PubMed Central journal article supplement — BJOG. 2022 Apr 22;129(8):1361–74. doi: 10.1111/1471-0528.17132 (PMC9111112; doi:10.1111/1471-0528.17132), 2022-04-22

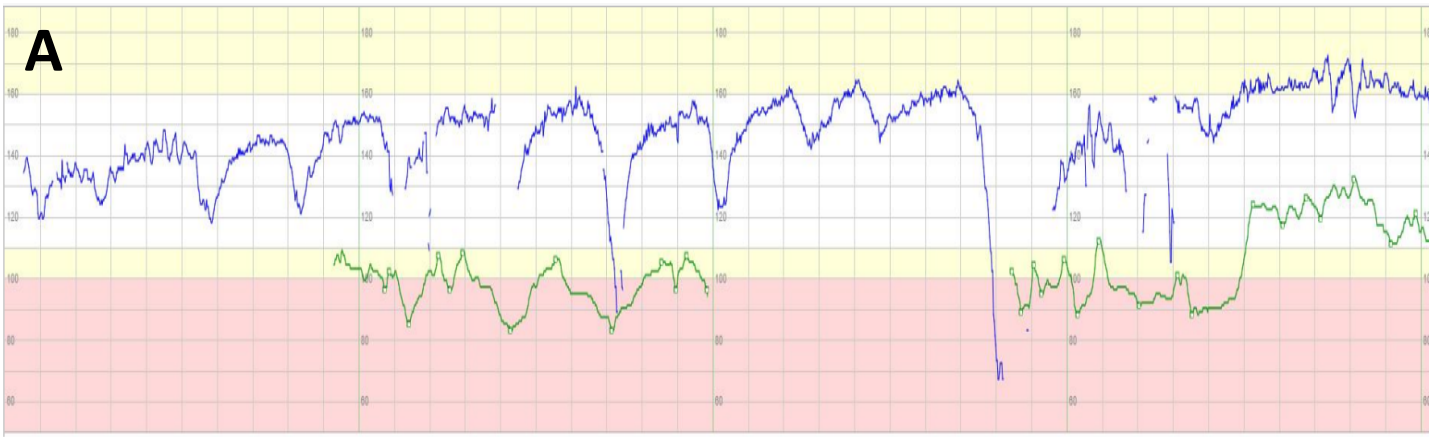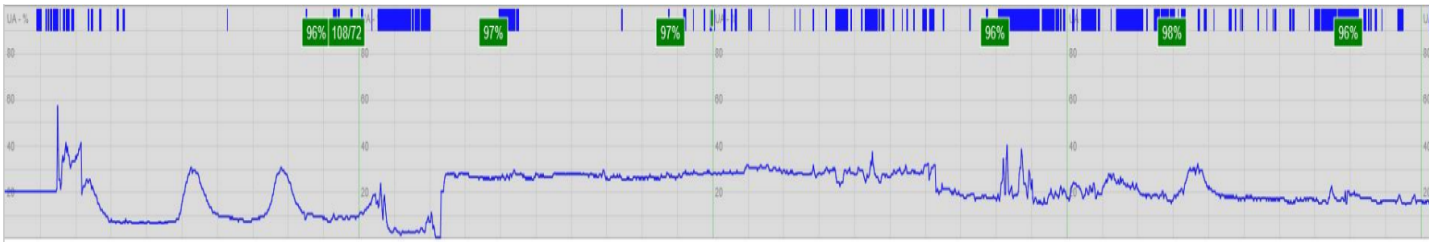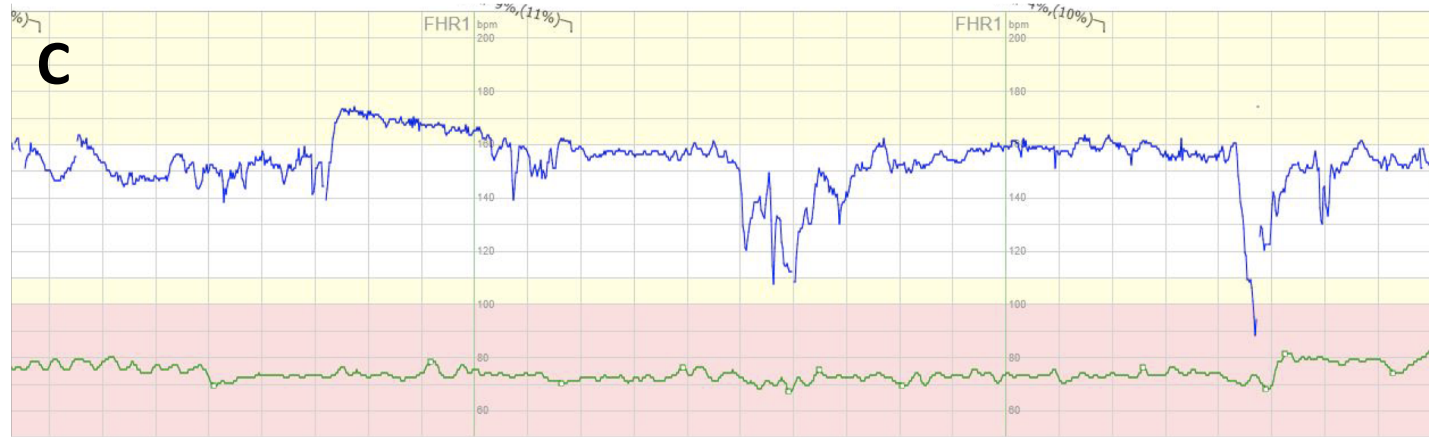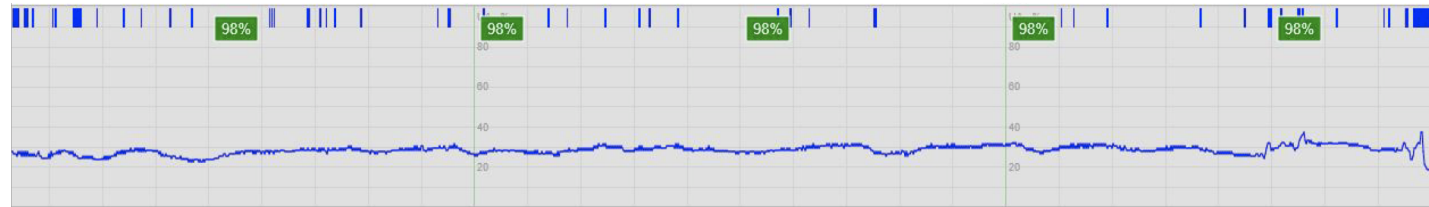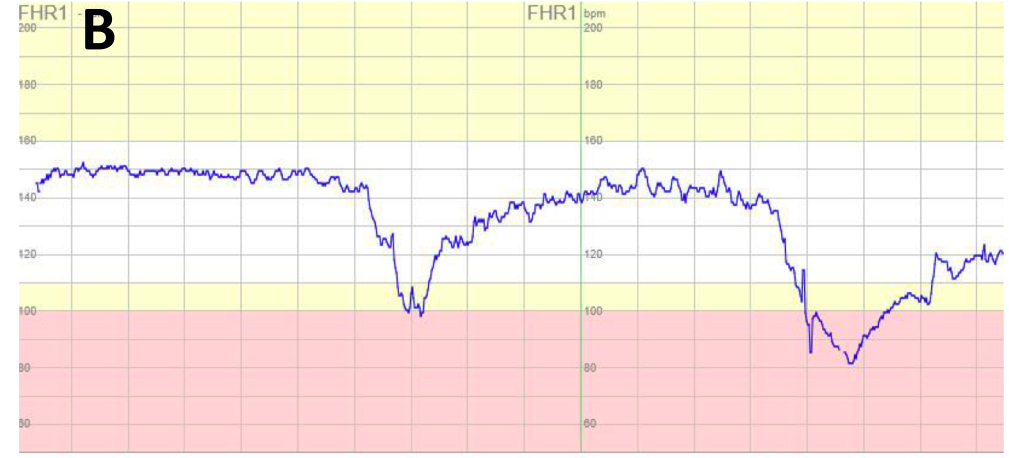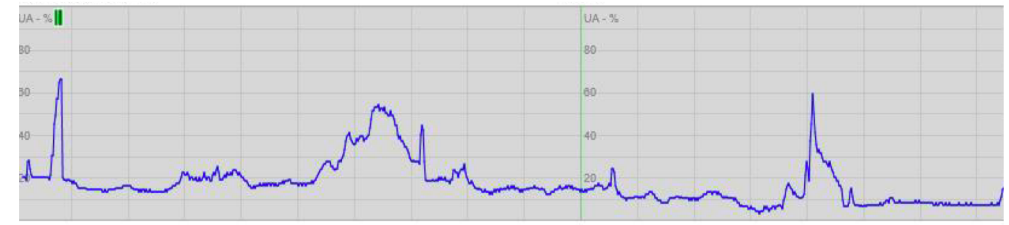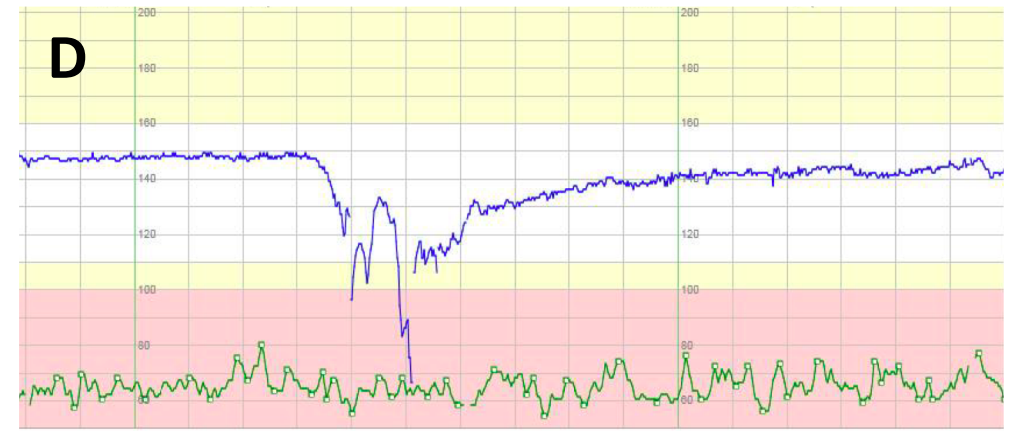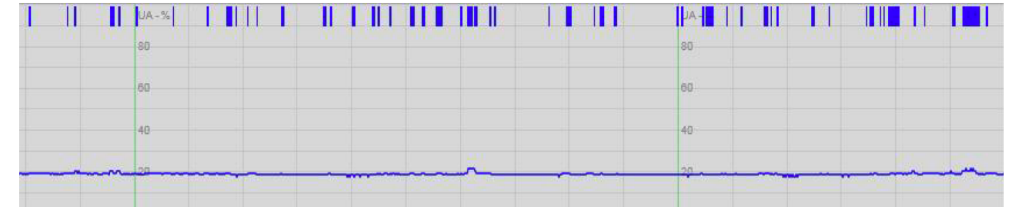

Supplement: BJO-129-1361-s013.pdf [file BJO-129-1361-s013.pdf]

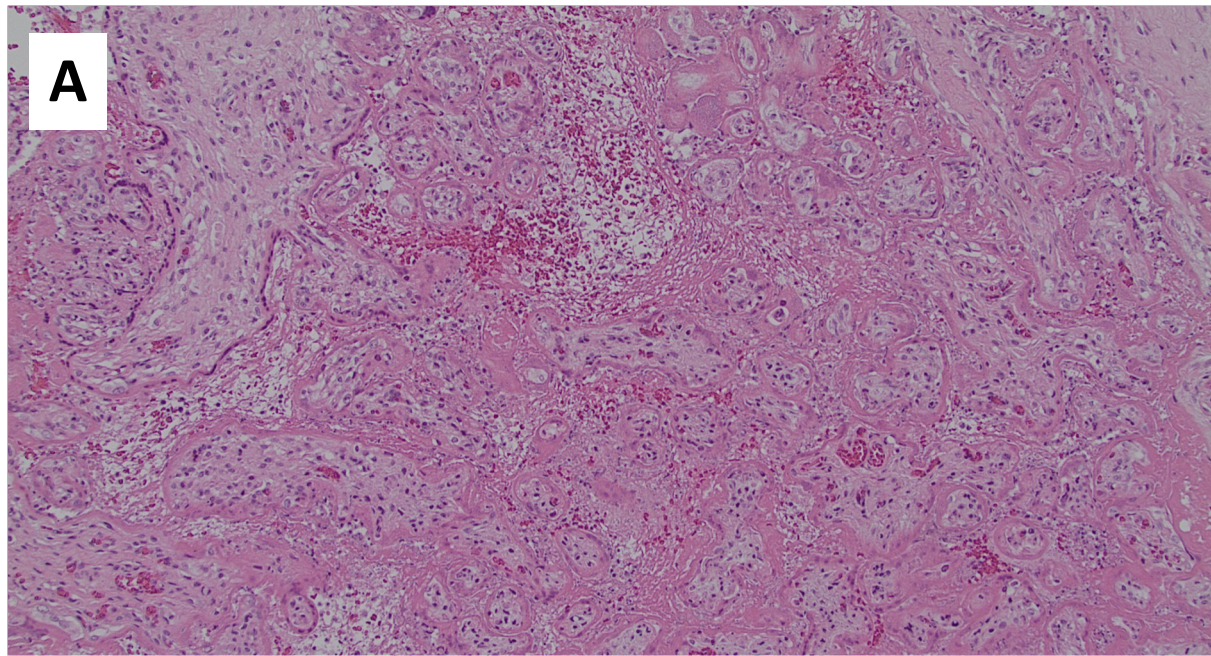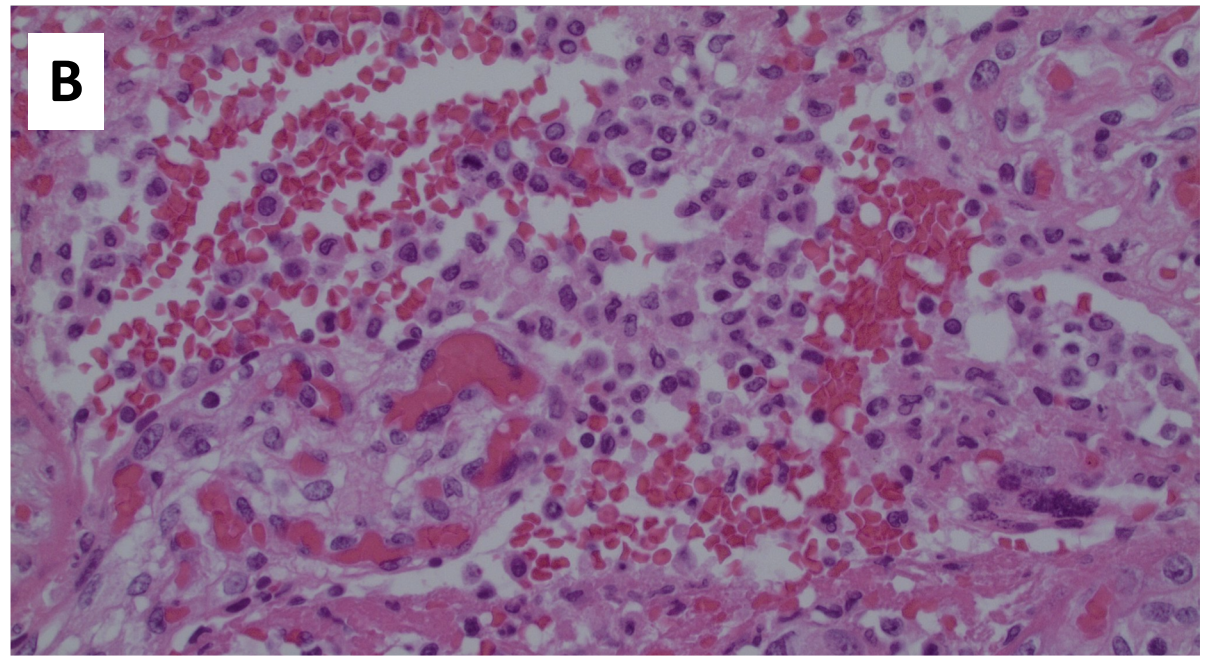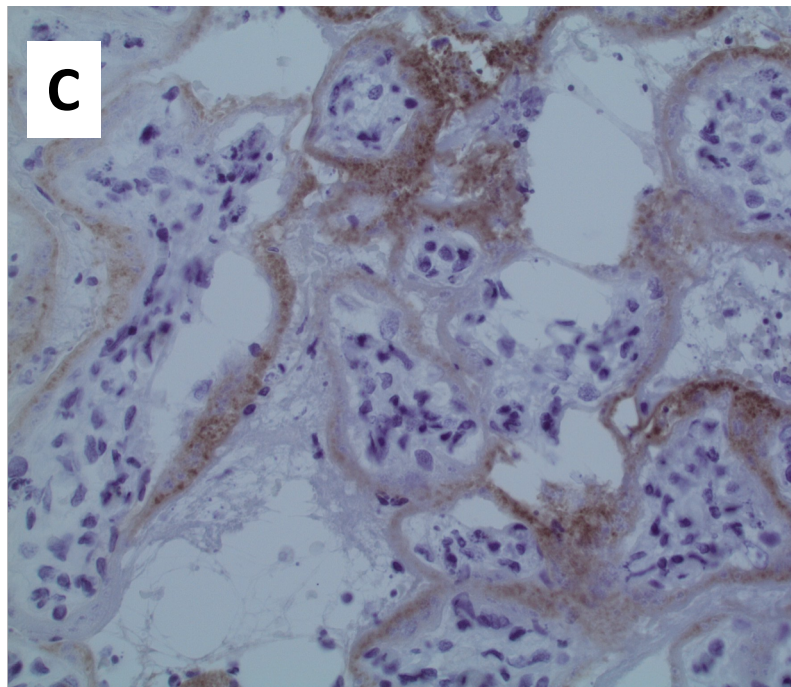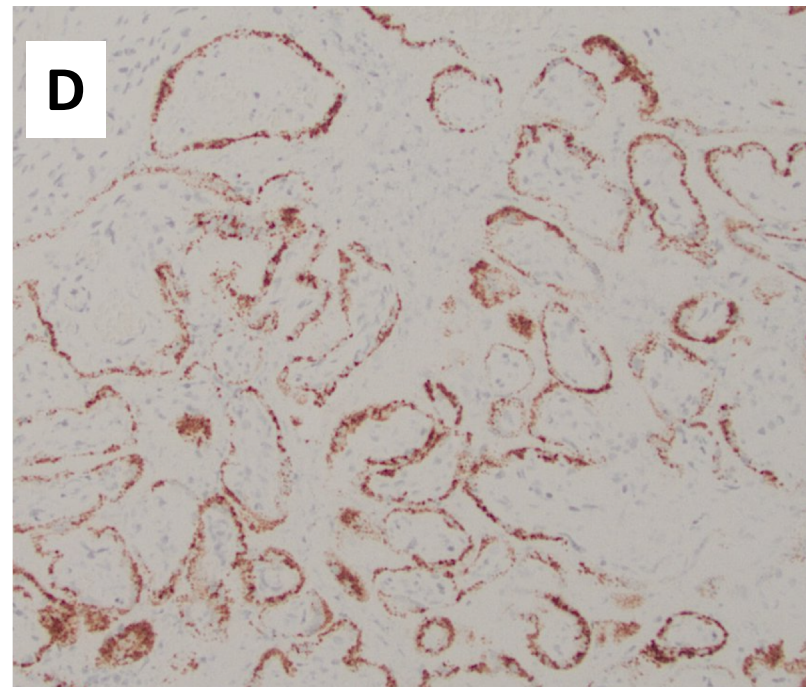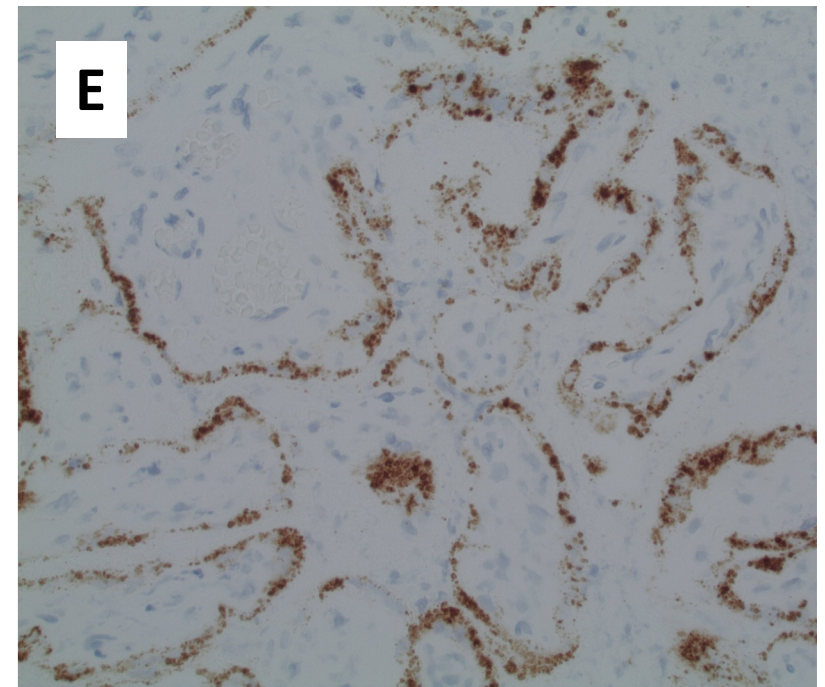

Supplement: BJO-129-1361-s016.pdf [file BJO-129-1361-s016.pdf]
